# Supplementary material
Source: PubMed Central journal article supplement (PMC3875673)
Supplement: cc-12-2978-s01.pdf [file cc-12-2978-s01.pdf]

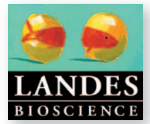

## **Supplemental Material to:**

**Elodie Lainey, Alice Wolfromm, Abdul Qader Sukkurwala,  
Jean-Baptiste Micol, Pierre Fenaux, Lorenzo Galluzzi,  
Oliver Kepp, and Guido Kroemer**

**EGFR inhibitors exacerbate differentiation and cell cycle  
arrest induced by retinoic acid and vitamin D3 in acute  
myeloid leukemia cells**

**Cell Cycle 2013; 12(18)**

**<http://dx.doi.org/10.4161/cc.26016>**

**<http://www.landesbioscience.com/journals/cc/article/26016>**

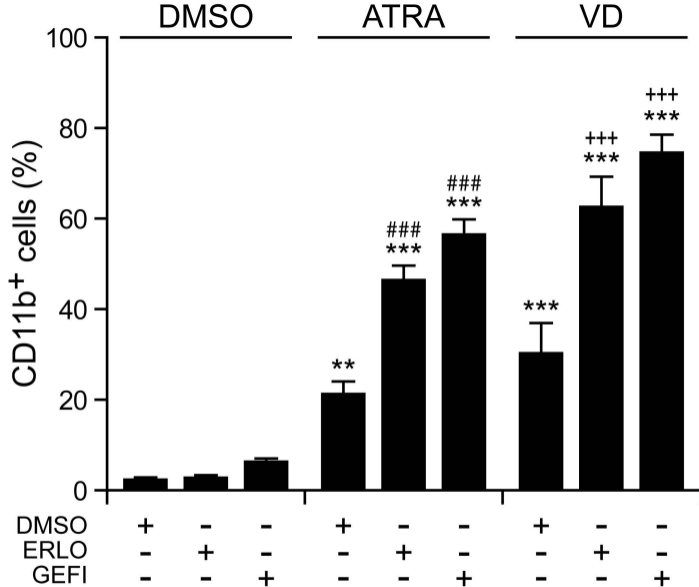

**Suppl. Figure 1**

**Supplementary Figure 1. Differentiation-inducing effects of EGFR inhibitors on MOLM-13 cells.** Human acute myeloid leukemia MOLM-13 cells were treated with 10  $\mu$ M erlotinib (ERLO), 10  $\mu$ M gefitinib (GEFI) or an equal volume of DMSO, alone or in combination with 100 nM all-*trans* retinoic acid (ATRA) or 50 nM 1 $\alpha$ ,25-hydroxycholecalciferol (VD), for 72h, then processed for the cytofluorometric assessment of CD11b expression upon immunostaining with a CD11b-specific antibody. Quantitative data on the percentage of CD11b-expressing cells are reported (means  $\pm$  SEM; n = 3). \*\* $p$ <0.01, \*\*\* $p$ <0.001 (ANOVA plus Dunnett's test), as compared to DMSO-treated cells; ### $p$ <0.001 (ANOVA plus Bonferroni's post-hoc test), as compared to ATRA-treated cells; +++ $p$ <0.001 (ANOVA plus Bonferroni's post-hoc test), as compared to VD-treated cells.

**Supplementary Table 1. Genetic features of AML patients included in this study.**

| Patient N <sup>o</sup> | Sex | Age (y) | Diagnosis | Relapse | Karyotype          | Mutations                                             |
|------------------------|-----|---------|-----------|---------|--------------------|-------------------------------------------------------|
| 1                      | M   | 70      | sAML      | No      | Complex            | <i>WT1</i> <sub>o</sub>                               |
| 2                      | F   | 80      | AML1      | No      | 46, XX             | <i>NPM1</i> <sub>m</sub> / <i>IDH1</i> <sub>m</sub>   |
| 3                      | F   | 27      | AML2      | No      | 46, XX             | <i>KMT2A</i> <sub>d</sub>                             |
| 4                      | F   | 39      | AML1      | No      | 46, XX             | <i>CEBPA</i> <sub>m</sub>                             |
| 5                      | M   | 82      | sAML      | No      | 45, XY, -7         | na                                                    |
| 6                      | F   | 76      | AML6      | Yes     | 46, XX             | <i>NPM1</i> <sub>m</sub>                              |
| 7                      | M   | 23      | AML1      | No      | Complex            | <i>WT1</i> <sub>o</sub>                               |
| 8                      | F   | 33      | AML2      | Yes     | 46, XX, t(8;21)    | <i>FLT3</i> <sub>itd</sub>                            |
| 9                      | F   | 53      | AML5      | No      | 46, XX             | <i>NPM1</i> <sub>m</sub>                              |
| 10                     | F   | 57      | sAML      | Yes     | 46, XX             | na                                                    |
| 11                     | F   | 34      | AML1      | Yes     | na                 | na                                                    |
| 12                     | M   | 23      | sAML      | No      | Hyperdiploid       | WT                                                    |
| 13                     | M   | 24      | sAML      | No      | Hyperdiploid       | na                                                    |
| 14                     | M   | 54      | AML4      | No      | 46, XY             | <i>NPM1</i> <sub>m</sub> / <i>FLT3</i> <sub>itd</sub> |
| 15                     | F   | 62      | AML1      | Yes     | 45, XX, -7         | <i>WT1</i> <sub>o</sub>                               |
| 16                     | F   | 67      | sAML      | No      | 46, XX             | <i>NPM1</i> <sub>m</sub> / <i>FLT3</i> <sub>itd</sub> |
| 17                     | F   | 75      | AML0      | No      | 45, XX, del17p     | WT                                                    |
| 18                     | M   | 41      | AML6      | No      | 46, XX, t(3;5)     | <i>WT1</i> <sub>o</sub>                               |
| 19                     | M   | 84      | sAML      | No      | 46, XY, del11q     | na                                                    |
| 20                     | M   | 59      | AML1      | No      | 46, XY, del17p, +8 | <i>NPM1</i> <sub>m</sub>                              |
| 21                     | M   | 55      | AML4      | No      | 45, XY, -7         | <i>WT1</i> <sub>o</sub>                               |
| 22                     | M   | 28      | AML2      | No      | 46, XY             | <i>FLT3</i> <sub>itd</sub>                            |
| 23                     | M   | 56      | AML5      | No      | 46, XY, t(9;11)    | WT                                                    |
| 24                     | F   | 63      | AML4      | No      | 46, XY             | na                                                    |

**Abbreviations:** AML, acute myeloid leukemia; dup, duplication; itd, internal tandem duplication; m, mutation; na, not available; o, overexpression; s, secondary; WT, wild type.
